# Supplementary material
Source: publisher figshare collection journal article supplement (https://tandf.figshare.com/ndownloader/files/20502837)
Supplement: Supplementary file 1 [file 20502837]

**Supplementary Information**

Hydrothermal syntheses, crystal structures, and optical properties of transition metal selenidostannates

SHUFEN LI, ZHENG WEI, NIANNIAN CHEN, YAN GAO, and DINGXIAN JIA*

Table S1. Selected bond lengths (Å) and angles (deg) for **1**.

| Sn(1)–Se(1) | 2.4762(9) | Sn(1)–Se(2) | 2.4664(11) |
| --- | --- | --- | --- |
| Sn(1)–Se(3) | 2.5727(9) | Sn(1)–Se(3)#1 | 2.5749(8) |
| Sn(1)–Se(3)#1 | 2.5750(8) | Se(1)–Mn(1) | 2.6587(13) |
| Se(2)–Mn(1) | 2.7589(12) | Mn(1)–N(1) | 2.324(5) |
| Mn(1)–N(2) | 2.267(6) | Mn(1)–N(3) | 2.305(6) |
| Mn(1)–N(4) | 2.223(6) |  |  |
|  |  |  |  |
| Se(1)–Sn(1)–Se(2) | 104.81(3) | Se(1)–Sn(1)–Se(3) | 117.01(3) |
| Se(1)–Sn(1)–Se(3)#1 | 112.59(3) | Se(2)–Sn(1)–Se(3) | 114.16(3) |
| Se(2)–Sn(1)–Se(3)#1 | 114.11(3) | Se(3)–Sn(1)–Se(3)#1 | 94.44(3) |
| Sn(1)–Se(1)–Mn(1) | 80.81(3) | Sn(1)–Se(2)–Mn(1) | 79.00(3) |
| Sn(1)–Se(3)–Sn(1)#1 | 85.56(3) | N(1)–Mn(1)–N(2) | 71.2(2) |
| N(1)–Mn(1)–N(3) | 84.1(2) | N(1)–Mn(1)–N(4) | 91.5(2) |
| N(2)–Mn(1)–N(3) | 92.2(2) | N(2)–Mn(1)–N(4) | 158.0(2) |
| N(3)–Mn(1)–N(4) | 72.0(2) | N(1)–Mn(1)–Se(1) | 170.74(15) |
| N(2)–Mn(1)–Se(1) | 99.51(15) | N(3)–Mn(1)–Se(1) | 96.30(14) |
| N(4)–Mn(1)–Se(1) | 97.39(15) | N(1)–Mn(1)–Se(2) | 88.44(14) |
| N(2)–Mn(1)–Se(2) | 94.04(14) | N(3)–Mn(1)–Se(2) | 168.17(17) |
| N(4)–Mn(1)–Se(2) | 99.15(17) | Se(1)–Mn(1)–Se(2) | 92.57(3) |

Symmetry transformations used to generate equivalent atoms: #1 –x+1, –y, –z+1.

Table S2. Selected bond lengths (Å) and angles (deg) for **2**.

| Sn(1)–Se(1) | 2.415(5) | Sn(1)–Se(2) | 2.595(4) |
| --- | --- | --- | --- |
| Sn(1)–Se(3) | 2.584(4) | Sn(1)–Se(4) | 2.539(4) |
| Sn(2)–Se(3) | 2.545(4) | Sn(2)–Se(4) | 2.822(4) |
| Sn(2)–Se(5) | 2.566(4) | Sn(2)–Se(6) | 2.671(4) |
| Sn(2)–Se(7) | 2.550(4) | Sn(3)–Se(2)#4 | 2.539(4) |
| Sn(3)–Se(5)#4 | 2.513(4) | Sn(3)–Se(6) | 2.509(4) |
| Sn(3)–Se(7) | 2.630(4) | Sn(4)–Se(8) | 2.527(4) |
| Sn(4)–Se(9) | 2.698(4) | Sn(4)–Se(10) | 2.558(4) |
| Sn(4)–Se(11) | 2.559(4) | Sn(4)–Se(12) | 2.803(4) |
| Sn(5)–Se(8) | 2.706(4) | Sn(5)–Se(9) | 2.526(4) |
| Sn(5)–Se(10) | 2.561(4) | Sn(5)–Se(12) | 2.770(4) |
| Sn(5)–Se(13) | 2.563(4) | Sn(6)–Se(11) | 2.576(4) |
| Sn(6)–Se(12) | 2.745(3) | Sn(6)–Se(13) | 2.580(4) |
| Sn(6)–Se(14) | 2.524(4) | Sn(6)–Se(14)#3 | 2.714(4) |
| Sn(6)–Se(14)#3 | 2.715(4) | Co(1)–N(1) | 2.105(17) |
| Co(1)–N(2) | 2.116(19) | Co(1)–N(3) | 2.186(18) |
| Co(1)–N(4) | 2.158(16) | Co(1)–N(5) | 2.189(18) |
| Co(1)–N(6) | 2.098(16) | Co(2)–N(7) | 2.181(17) |
| Co(2)–N(8) | 2.208(19) | Co(2)–N(9) | 2.091(15) |
| Co(2)–N(10) | 2.169(18) | Co(2)–N(11) | 2.170(17) |
| Co(2)–N(12) | 2.172(17) |  |  |
|  |  |  |  |
| Se(1)–Sn(1)–Se(2) | 111.66(18) | Se(1)–Sn(1)–Se(3) | 113.78(18) |
| Se(1)–Sn(1)–Se(4) | 127.09(19) | Se(2)–Sn(1)–Se(3) | 112.84(15) |
| Se(2)–Sn(1)–Se(4) | 96.42(13) | Se(3)–Sn(1)–Se(4) | 93.11(13) |
| Se(3)–Sn(2)–Se(4) | 87.60(13) | Se(3)–Sn(2)–Se(5) | 112.77(14) |
| Se(3)–Sn(2)–Se(6) | 97.65(14) | Se(3)–Sn(2)–Se(7) | 125.79(14) |
| Se(4)–Sn(2)–Se(5) | 92.22(12) | Se(4)–Sn(2)–Se(6) | 174.73(14) |
| Se(4)–Sn(2)–Se(7) | 86.16(13) | Se(5)–Sn(2)–Se(6) | 86.17(12) |
| Se(5)–Sn(2)–Se(7) | 121.24(14) | Se(6)–Sn(2)–Se(7) | 90.38(13) |
| Se(2)#4–Sn(3)–Se(5)#4 | 109.34(14) | Se(2)#4–Sn(3)–Se(6) | 128.03(16) |
| Se(2)#4–Sn(3)–Se(7) | 99.65(14) | Se(5)#4–Sn(3)–Se(6) | 117.96(14) |
| Se(5)#4–Sn(3)–Se(7) | 100.30(14) | Se(6)–Sn(3)–Se(7) | 92.23(13) |
| Se(8)–Sn(4)–Se(9) | 89.42(11) | Se(8)–Sn(4)–Se(10) | 119.89(13) |
| Se(8)–Sn(4)–Se(11) | 131.33(14) | Se(8)–Sn(4)–Se(12) | 89.66(11) |
| Se(9)–Sn(4)–Se(10) | 90.69(12) | Se(9)–Sn(4)–Se(11) | 94.24(12) |
| Se(9)–Sn(4)–Se(12) | 178.88(12) | Se(10)–Sn(4)–Se(11) | 108.59(13) |
| Se(10)–Sn(4)–Se(12) | 89.23(11) | Se(11)–Sn(4)–Se(12) | 86.84(11) |
| Se(8)–Sn(5)–Se(9) | 89.25(11) | Se(8)–Sn(5)–Se(10) | 89.96(12) |
| Se(8)–Sn(5)–Se(12) | 178.00(12) | Se(8)–Sn(5)–Se(13) | 91.84(12) |
| Se(9)–Sn(5)–Se(10) | 119.54(13) | Se(9)–Sn(5)–Se(12) | 92.56(11) |
| Se(9)–Sn(5)–Se(13) | 126.84(14) | Se(10)–Sn(5)–Se(12) | 89.89(11) |
| Se(10)–Sn(5)–Se(13) | 113.60(13) | Se(12)–Sn(5)–Se(13) | 86.39(11) |
| Se(11)–Sn(6)–Se(12) | 87.76(11) | Se(11)–Sn(6)–Se(13) | 119.13(14) |
| Se(11)–Sn(6)–Se(14) | 115.72(14) | Se(11)–Sn(6)–Se(14)#3 | 90.09(12) |
| Se(12)–Sn(6)–Se(13) | 86.59(11) | Se(12)–Sn(6)–Se(14) | 95.77(12) |
| Se(12)–Sn(6)–Se(14)#3 | 174.48(12) | Se(13)–Sn(6)–Se(14) | 125.15(13) |
| Se(13)–Sn(6)–Se(14)#3 | 90.02(12) | Se(14)–Sn(6)–Se(14)#3 | 89.75(12) |
| Sn(1)–Se(2)–Sn(3)#1 | 93.98(14) | Sn(1)–Se(3)–Sn(2) | 88.82(13) |
| Sn(1)–Se(4)–Sn(2) | 83.87(12) | Sn(2)–Se(5)–Sn(3)#1 | 98.83(13) |
| Sn(2)–Se(6)–Sn(3) | 88.67(14) | Sn(2)–Se(7)–Sn(3) | 88.72(14) |
| Sn(4)–Se(8)–Sn(5)#2 | 89.71(12) | Sn(4)–Se(9)–Sn(5)#2 | 89.91(12) |
| Sn(4)–Se(10)–Sn(5) | 94.74(12) | Sn(4)–Se(11)–Sn(6) | 95.09(12) |
| Sn(4)–Se(12)–Sn(5) | 85.02(10) | Sn(4)–Se(12)–Sn(6) | 86.14(10) |
| Sn(5)–Se(12)–Sn(6) | 85.89(10) | Sn(5)–Se(13)–Sn(6) | 93.88(12) |
| Sn(6)–Se(14)–Sn(6)#3 | 90.25(12) | N(1)–Co(1)–N(2) | 77.0(12) |
| N(1)–Co(1)–N(3) | 90.4(10) | N(1)–Co(1)–N(4) | 92.3(10) |
| N(1)–Co(1)–N(5) | 92.2(11) | N(1)–Co(1)–N(6) | 175.0(11) |
| N(2)–Co(1)–N(3) | 91.0(12) | N(2)–Co(1)–N(4) | 167.8(11) |
| N(2)–Co(1)–N(5) | 90.4(11) | N(2)–Co(1)–N(6) | 100.5(12) |
| N(3)–Co(1)–N(4) | 83.2(11) | N(3)–Co(1)–N(5) | 177.3(11) |
| N(3)–Co(1)–N(6) | 93.9(12) | N(4)–Co(1)–N(5) | 95.8(10) |
| N(4)–Co(1)–N(6) | 90.7(9) | N(5)–Co(1)–N(6) | 83.5(12) |
| N(7)–Co(2)–N(8) | 86.8(12) | N(7)–Co(2)–N(9) | 175.8(10) |
| N(7)–Co(2)–N(10) | 100.7(12) | N(7)–Co(2)–N(11) | 95.9(11) |
| N(7)–Co(2)–N(12) | 88.5(10) | N(8)–Co(2)–N(9) | 89.7(11) |
| N(8)–Co(2)–N(10) | 93.9(12) | N(8)–Co(2)–N(11) | 170.9(12) |
| N(8)–Co(2)–N(12) | 93.6(13) | N(9)–Co(2)–N(10) | 77.2(11) |
| N(9)–Co(2)–N(11) | 87.8(9) | N(9)–Co(2)–N(12) | 94.1(8) |
| N(10)–Co(2)–N(11) | 94.1(10) | N(10)–Co(2)–N(12) | 168.5(11) |
| N(11)–Co(2)–N(12) | 77.8(11) | C(1)–N(1)–Co(1) | 125(2) |
| C(5)–N(1)–Co(1) | 107(2) | C(6)–N(2)–Co(1) | 123(3) |
| C(10)–N(2)–Co(1) | 108(3) | C(11)–N(3)–Co(1) | 131(3) |
| C(15)–N(3)–Co(1) | 105.2(18) | C(16)–N(4)–Co(1) | 106.2(19) |
| C(20)–N(4)–Co(1) | 114(2) | C(21)–N(5)–Co(1) | 119(2) |
| C(25)–N(5)–Co(1) | 102(2) | C(26)–N(6)–Co(1) | 108(2) |
| C(30)–N(6)–Co(1) | 122(3) | C(31)–N(7)–Co(2) | 118(2) |
| C(35)–N(7)–Co(2) | 105(3) | C(36)–N(8)–Co(2) | 97(3) |
| C(40)–N(8)–Co(2) | 135(3) | C(41)–N(9)–Co(2) | 123(2) |
| C(45)–N(9)–Co(2) | 111.8(17) | C(46)–N(10)–Co(2) | 111(2) |
| C(50)–N(10)–Co(2) | 112(2) | C(51)–N(11)–Co(2) | 114(2) |
| C(55)–N(11)–Co(2) | 108.9(19) | C(56)–N(12)–Co(2) | 108(2) |
| C(60)–N(12)–Co(2) | 119(3) |  |  |

Symmetry transformations used to generate equivalent atoms: #1 –x+1, y–1/2, –z+1/2; #2 –x, y–1/2, –z+1/2; #3 –x, –y+1, –z+1; #4 –x+1, y+1/2, –z+1/2.

Table S3. Selected bond lengths (Å) and angles (deg) for **3**.

| Sn(1)–Se(1) | 2.7954(14) | Sn(1)–Se(2) | 2.5518(15) |
| --- | --- | --- | --- |
| Sn(1)–Se(3) | 2.5525(15) | Sn(1)–Se(4) | 2.6951(15) |
| Sn(1)–Se(5) | 2.5236(15) | Sn(2)–Se(1) | 2.7628(15) |
| Sn(2)–Se(2) | 2.5565(14) | Sn(2)–Se(4)#4 | 2.5222(15) |
| Sn(2)–Se(5)#4 | 2.7024(15) | Sn(2)–Se(5)#4 | 2.7025(15) |
| Sn(2)–Se(6) | 2.5594(15) | Sn(3)–Se(1) | 2.7465(15) |
| Sn(3)–Se(3) | 2.5719(14) | Sn(3)–Se(6) | 2.5750(14) |
| Sn(3)–Se(7)#4 | 2.5163(17) | Sn(3)–Se(7) | 2.7122(16) |
| Sn(3)–Se(7)#2 | 2.5164(17) | Sn(4)–Se(8) | 2.5759(16) |
| Sn(4)–Se(9) | 2.5404(18) | Sn(4)–Se(10) | 2.408(2) |
| Sn(4)–Se(11) | 2.5909(16) | Sn(5)–Se(8) | 2.5440(16) |
| Sn(5)–Se(9) | 2.8176(16) | Sn(5)–Se(12) | 2.5480(17) |
| Sn(5)–Se(13) | 2.6729(16) | Sn(5)–Se(14) | 2.5625(14) |
| Sn(6)–Se(11)#5 | 2.5356(17) | Sn(6)–Se(11) | 2.5357(17) |
| Sn(6)–Se(12) | 2.6297(17) | Sn(6)–Se(13) | 2.5075(18) |
| Sn(6)–Se(14)#5 | 2.5104(15) | Sn(6)–Se(14) | 2.5103(15) |
| Ni(1)–N(1) | 2.120(11) | Ni(1)–N(2) | 2.079(9) |
| Ni(1)–N(3) | 2.076(10) | Ni(1)–N(4) | 2.129(10) |
| Ni(1)–N(5) | 2.076(10) | Ni(1)–N(6) | 2.104(10) |
| Ni(2)–N(7) | 2.124(11) | Ni(2)–N(8) | 2.101(11) |
| Ni(2)–N(9) | 2.077(10) | Ni(2)–N(10) | 2.097(10) |
| Ni(2)–N(11) | 2.099(10) | Ni(2)–N(12) | 2.089(9) |
|  |  |  |  |
| Se(1)–Sn(1)–Se(2) | 89.15(5) | Se(1)–Sn(1)–Se(3) | 86.96(4) |
| Se(1)–Sn(1)–Se(4) | 178.75(5) | Se(1)–Sn(1)–Se(5) | 89.58(5) |
| Se(2)–Sn(1)–Se(3) | 108.59(5) | Se(2)–Sn(1)–Se(4) | 90.79(5) |
| Se(2)–Sn(1)–Se(5) | 119.97(5) | Se(3)–Sn(1)–Se(4) | 94.24(5) |
| Se(3)–Sn(1)–Se(5) | 131.24(5) | Se(4)–Sn(1)–Se(5) | 89.37(5) |
| Se(1)–Sn(2)–Se(2) | 89.78(5) | Se(1)–Sn(2)–Se(4)#4 | 92.48(5) |
| Se(1)–Sn(2)–Se(5)#4 | 178.11(5) | Se(1)–Sn(2)–Se(6) | 86.56(4) |
| Se(2)–Sn(2)–Se(4)#4 | 119.63(5) | Se(2)–Sn(2)–Se(5)#4 | 90.08(5) |
| Se(2)–Sn(2)–Se(6) | 113.54(5) | Se(4)#4–Sn(2)–Se(5)#4 | 89.23(4) |
| Se(4)#4–Sn(2)–Se(6) | 126.82(5) | Se(5)–Sn(2)–Se(5)#4 | 91.78(5) |
| Se(1)–Sn(3)–Se(3) | 87.63(4) | Se(1)–Sn(3)–Se(6) | 86.60(4) |
| Se(1)–Sn(3)–Se(7) | 174.45(5) | Se(1)–Sn(3)–Se(7)#2 | 95.81(5) |
| Se(3)–Sn(3)–Se(6) | 119.02(6) | Se(3)–Sn(3)–Se(7) | 90.22(5) |
| Se(3)–Sn(3)–Se(7) | 115.79(5) | Se(6)–Sn(3)–Se(7) | 89.99(5) |
| Se(6)–Sn(3)–Se(7)#2 | 125.19(5) | Se(8)–Sn(4)–Se(9) | 92.99(5) |
| Se(8)–Sn(4)–Se(10) | 113.76(7) | Se(8)–Sn(4)–Se(11) | 113.24(6) |
| Se(9)–Sn(4)–Se(10) | 126.86(8) | Se(9)–Sn(4)–Se(11) | 96.17(6) |
| Se(10)–Sn(4)–Se(11) | 111.87(7) | Se(8)–Sn(5)–Se(9) | 87.45(5) |
| Se(8)–Sn(5)–Se(12) | 125.68(6) | Se(8)–Sn(5)–Se(13) | 97.69(5) |
| Se(8)–Sn(5)–Se(14) | 112.82(6) | Se(9)–Sn(5)–Se(12) | 86.25(5) |
| Se(9)–Sn(5)–Se(13) | 174.86(5) | Se(9)–Sn(5)–Se(14) | 92.08(5) |
| Se(12)–Sn(5)–Se(13) | 90.52(5) | Se(12)–Sn(5)–Se(14) | 121.28(6) |
| Se(13)–Sn(5)–Se(14) | 86.17(5) | Se(11)–Sn(6)–Se(12) | 99.67(6) |
| Se(11)–Sn(6)–Se(13) | 127.99(6) | Se(11)–Sn(6)–Se(14) | 109.25(6) |
| Se(12)–Sn(6)–Se(13) | 92.42(5) | Se(12)–Sn(6)–Se(14) | 100.51(5) |
| Se(13)–Sn(6)–Se(14) | 117.90(6) | Sn(1)–Se(1)–Sn(2) | 85.13(4) |
| Sn(1)–Se(1)–Sn(3) | 86.11(4) | Sn(2)–Se(1)–Sn(3) | 85.82(4) |
| Sn(1)–Se(2)–Sn(2) | 94.79(5) | Sn(1)–Se(3)–Sn(3) | 95.18(5) |
| Sn(1)–Se(4)–Sn(2)#1 | 89.95(5) | Sn(1)–Se(5)–Sn(2)#1 | 89.75(5) |
| Sn(2)–Se(6)–Sn(3) | 93.87(5) | Sn(3)–Se(7)–Sn(3)#1 | 90.27(5) |
| Sn(4)–Se(8)–Sn(5) | 88.97(5) | Sn(4)–Se(9)–Sn(5) | 83.90(5) |
| Sn(4)–Se(11)–Sn(6)#3 | 94.22(5) | Sn(5)–Se(12)–Sn(6) | 88.58(6) |
| Sn(5)–Se(13)–Sn(6) | 88.48(6) | Sn(5)–Se(14)–Sn(6)#3 | 99.03(5) |
| N(1)–Ni(1)–N(2) | 81.6(4) | N(1)–Ni(1)–N(3) | 94.5(4) |
| N(1)–Ni(1)–N(4) | 174.5(4) | N(1)–Ni(1)–N(5) | 96.0(4) |
| N(1)–Ni(1)–N(6) | 91.6(4) | N(2)–Ni(1)–N(3) | 88.8(4) |
| N(2)–Ni(1)–N(4) | 95.0(4) | N(2)–Ni(1)–N(5) | 176.7(4) |
| N(2)–Ni(1)–N(6) | 95.5(4) | N(3)–Ni(1)–N(4) | 81.1(4) |
| N(3)–Ni(1)–N(5) | 93.6(4) | N(3)–Ni(1)–N(6) | 173.0(4) |
| N(4)–Ni(1)–N(5) | 87.6(4) | N(4)–Ni(1)–N(6) | 93.0(4) |
| N(5)–Ni(1)–N(6) | 82.3(4) | N(7)–Ni(2)–N(8) | 83.3(5) |
| N(7)–Ni(2)–N(9) | 93.9(4) | N(7)–Ni(2)–N(10) | 174.2(4) |
| N(7)–Ni(2)–N(11) | 94.5(4) | N(7)–Ni(2)–N(12) | 89.2(4) |
| N(8)–Ni(2)–N(9) | 88.9(4) | N(8)–Ni(2)–N(10) | 92.4(4) |
| N(8)–Ni(2)–N(11) | 176.6(4) | N(8)–Ni(2)–N(12) | 94.3(4) |
| N(9)–Ni(2)–N(10) | 82.2(4) | N(9)–Ni(2)–N(11) | 93.8(4) |
| N(9)–Ni(2)–N(12) | 175.8(4) | N(10)–Ni(2)–N(11) | 90.0(4) |
| N(10)–Ni(2)–N(12) | 95.0(4) | N(11)–Ni(2)–N(12) | 83.0(4) |
| C(1)–N(1)–Ni(1) | 122.4(10) | C(5)–N(1)–Ni(1) | 108.3(9) |
| C(6)–N(2)–Ni(1) | 110.6(7) | C(10)–N(2)–Ni(1) | 122.0(9) |
| C(11)–N(3)–Ni(1) | 121.9(10) | C(15)–N(3)–Ni(1) | 111.1(9) |
| C(16)–N(4)–Ni(1) | 107.3(8) | C(20)–N(4)–Ni(1) | 121.6(10) |
| C(21)–N(5)–Ni(1) | 122.8(10) | C(25)–N(5)–Ni(1) | 108.9(9) |
| C(26)–N(6)–Ni(1) | 108.8(9) | C(30)–N(6)–Ni(1) | 122.2(9) |
| C(31)–N(7)–Ni(2) | 123.7(10) | C(35)–N(7)–Ni(2) | 106.6(10) |
| C(36)–N(8)–Ni(2) | 108.4(10) | C(40)–N(8)–Ni(2) | 122.0(10) |
| C(41)–N(9)–Ni(2) | 122.2(9) | C(45)–N(9)–Ni(2) | 110.3(8) |
| C(46)–N(10)–Ni(2) | 108.5(8) | C(50)–N(10)–Ni(2) | 123.3(9) |
| C(51)–N(11)–Ni(2) | 122.5(10) | C(55)–N(11)–Ni(2) | 108.6(8) |
| C(56)–N(12)–Ni(2) | 108.3(8) | C(60)–N(12)–Ni(2) | 123.8(9) |

Symmetry transformations used to generate equivalent atoms: #1 –x+1, y–1/2, –z+1/2; #2 –x+1, –y+2, –z; #3 –x, y–1/2, –z+1/2; #4 –x+1, y+1/2, –z+1/2; #5 –x, y+1/2, –z+1/2.


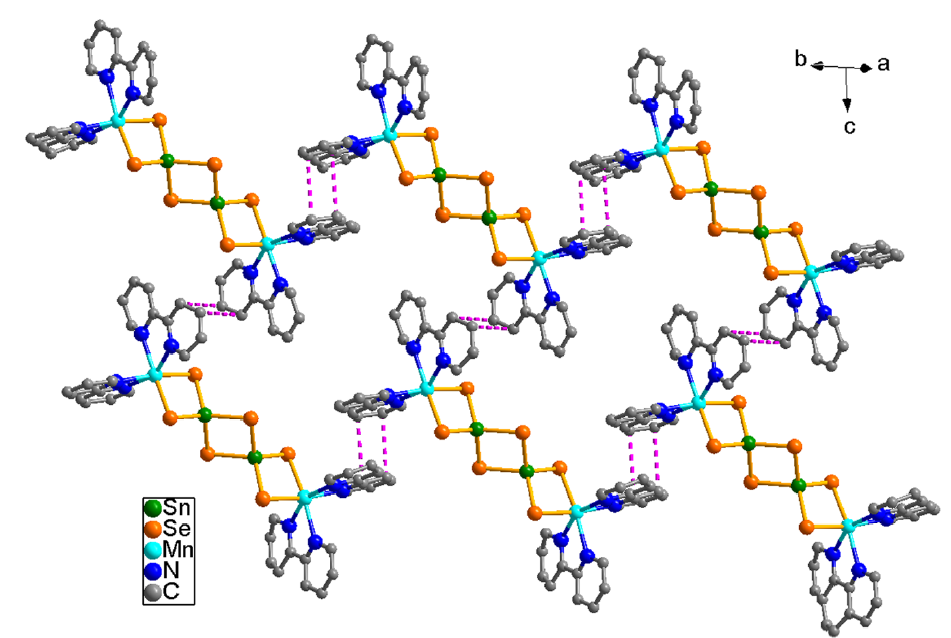


Figure S1. A view of the layer formed by π···π stacking interactions between {[Mn(2,2'-bipy)2]2[*µ*2-Sn2Se6]} molecules.


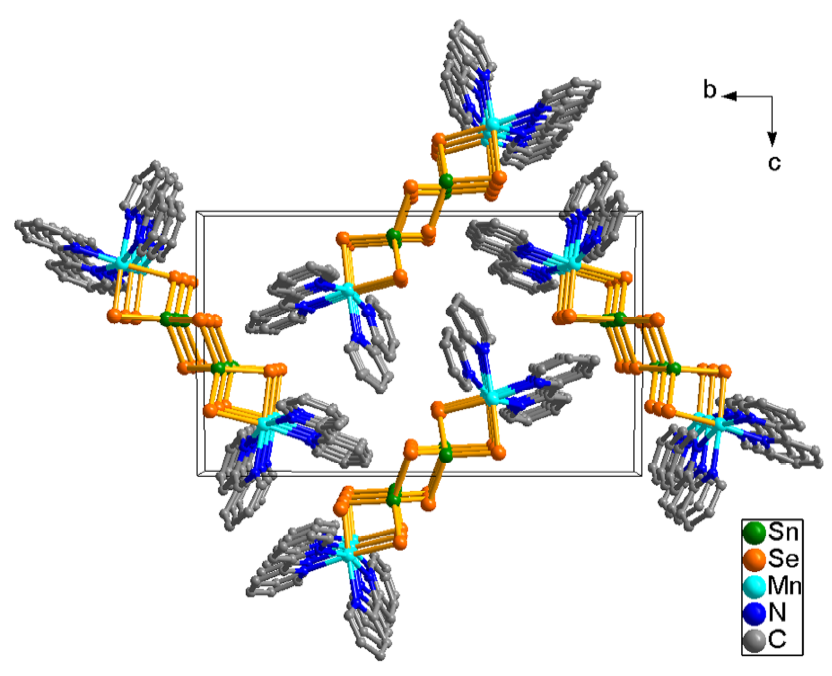


Figure S2. Crystal packing diagram of **1** viewed along the *a* axis.


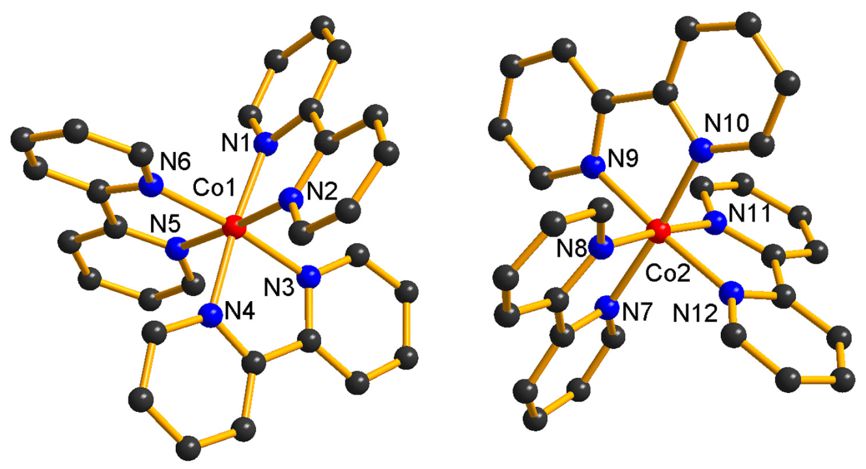


Figure S3. Structure of [Co(1)( 2,2'-bipy)3]2+ and [Co(2)(2,2'-bipy)3]2+ cations in **2** with the labeling scheme.


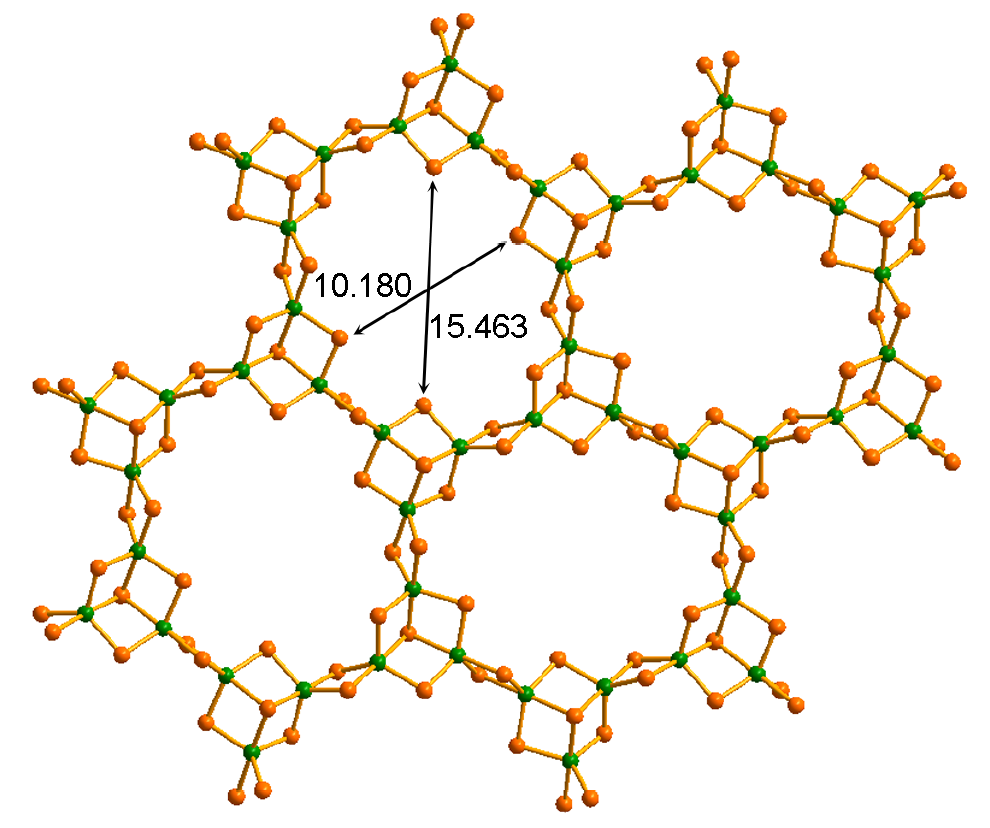


Figure S4. (a) Structure of the **2**-**D** polymeric {[Sn3Se7]2–}*n* in **2** showing the ring size. Values are given in angstroms.


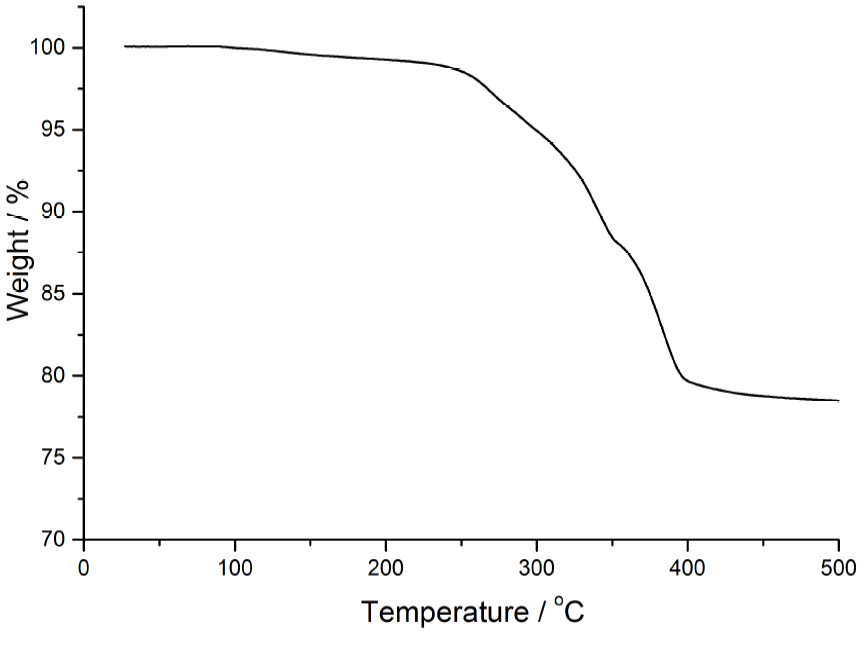

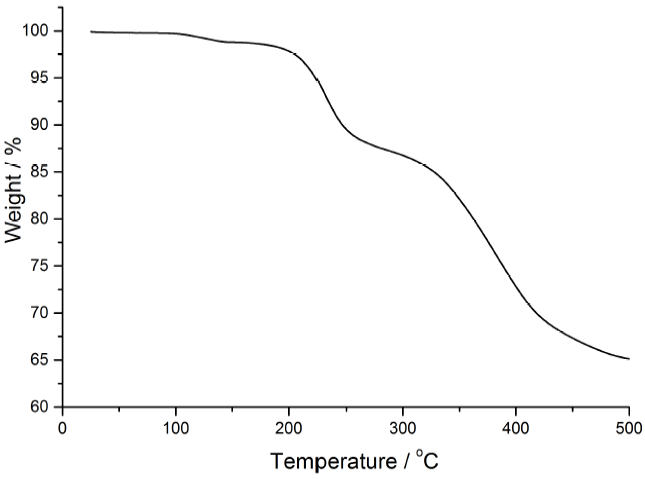


Figure S5. TG curves of **1** (right) and **2** (left).


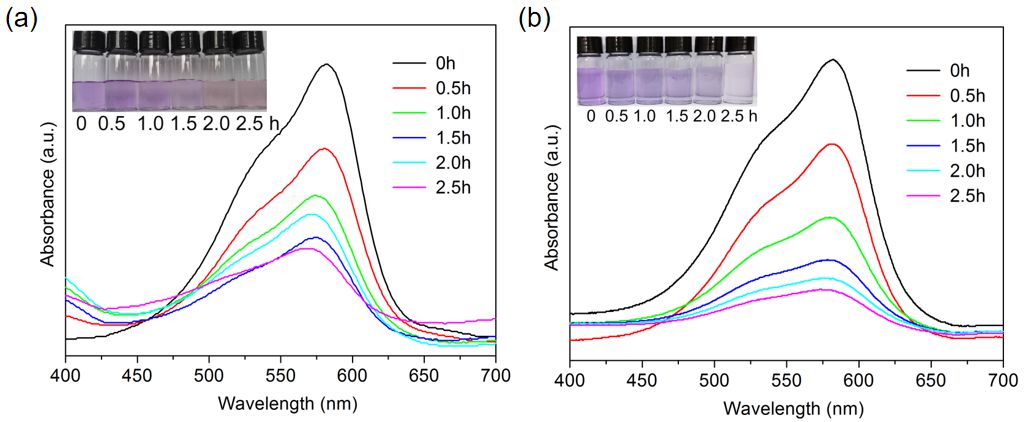


Figure S6. Time dependent absorption spectra of CV solution with photodegradation catalyzed by **1** (a) and **2** (b).

Figure S7. IR spectrum of **1**.

Figure S8. IR spectrum of **2**.

Figure S9. IR spectrum of **3**.
